# Supplementary material for: Profiling of RNA-binding protein binding sites by in situ reverse transcription-based sequencing
Source: Springer Nature journal article supplement (doi:10.1038/s41592-023-02146-w), 2024-01-10
Supplement: MOESM1 [file 41592_2023_2146_MOESM1_ESM.pdf › 41592_2023_2146_MOESM1_ESM.pdf]

# Profiling of RNA-binding protein binding sites by in situ reverse transcription-based sequencing

---

In the format provided by the  
authors and unedited

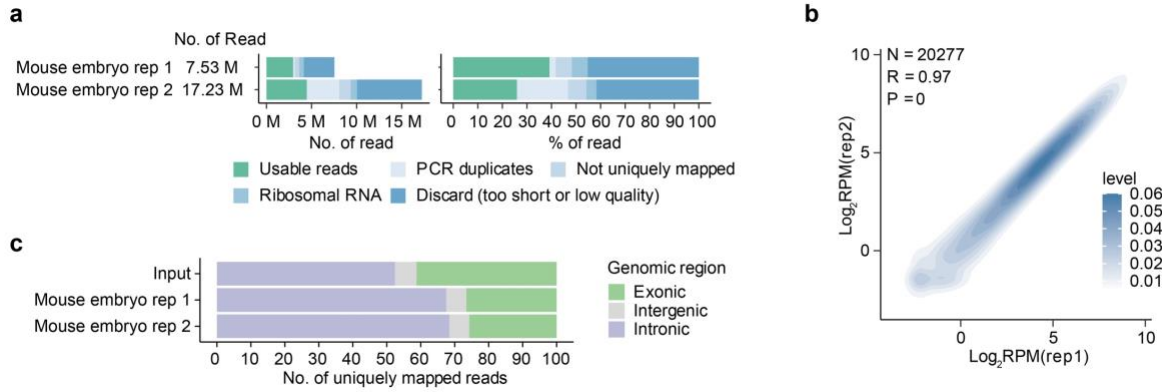

**Supplementary Fig. 1. Quality of ARTR-seq libraries using mouse embryo tissues.**

**a**, Bar plots showing numbers (left) and percentages (right) of the usable reads and reads filtered after each processing step for ARTR-seq libraries. **b**, ARTR-seq replicate correlations for usable reads per gene normalized to coverage (RPM) for RBFOX2 in mouse embryos. The color scale shows the point distribution density. The coefficient R and P-values were given by the two-tailed Pearson's correlation. **c**, A bar plot showing the usable reads distribution in the intronic (purple), intergenic (grey) and exonic (green) regions of ARTR-seq libraries constructed from mouse embryos.

| Gene Name | Gene ID | Primer direction | Primer sequence (5' to 3') |
|-----------|---------|------------------|----------------------------|
| GAPDH     | 2597    | Forward          | GTCTCCTCTGACTTCAACAGCG     |
| GAPDH     | 2597    | Reverse          | ACCACCCTGTTGCTGTAGCCAA     |
| ACTB      | 60      | Forward          | CACCATTGGCAATGAGCGGTTC     |
| ACTB      | 60      | Reverse          | AGGTCTTTGCGGATGTCCACGT     |
| METTL3    | 56339   | Forward          | CTATCTCCTGGCACTCGCAAGA     |
| METTL3    | 56339   | Reverse          | GCTTGAACCGTGCAACCACATC     |
| METTL14   | 57721   | Forward          | CTGAAAGTGCCGACAGCATTGG     |
| METTL14   | 57721   | Reverse          | CTCTCCTTCATCCAGATACTTACG   |
| RBM15     | 29890   | Forward          | TGGTAACCTGGACCACAGCGTA     |
| RBM15     | 29890   | Reverse          | GGTTCTGGAACCTGAGGAAGGC     |

**Supplementary Table 1. Quantitative PCR primers.**

| Name                 | Manufactory       | Target sequence (5' to 3') |
|----------------------|-------------------|----------------------------|
| <i>PTBP1</i> siRNA-1 | Horizon Discovery | GGCACAAGCUGCACGGGAA        |
| <i>PTBP1</i> siRNA-2 | Horizon Discovery | GCAUCACGCUCUCGAAGCA        |

**Supplementary Table 2. siRNA sequence for *PTBP1* knockdown.**

| Method | Cell number | Cell line | Type  | Sample size<br>(number of usable reads) |
|--------|-------------|-----------|-------|-----------------------------------------|
| ARTR   | 40 k        | HepG2     | Input | 4596513                                 |
| ARTR   | 40 k        | HepG2     | PTBP1 | 9518232                                 |
| ARTR   | 40 k        | HepG2     | PTBP1 | 7664034                                 |
| ARTR   | 5 k         | HepG2     | PTBP1 | 3285354                                 |
| ARTR   | 2 k         | HepG2     | PTBP1 | 4751687                                 |
| ARTR   | 1 k         | HepG2     | PTBP1 | 1947829                                 |
| ARTR   | 500         | HepG2     | PTBP1 | 2962287                                 |
| ARTR   | 200         | HepG2     | PTBP1 | 1947023                                 |
| ARTR   | 100         | HepG2     | PTBP1 | 1576131                                 |
| ARTR   | 50          | HepG2     | PTBP1 | 1173292                                 |
| ARTR   | 20          | HepG2     | PTBP1 | 465677                                  |
| CLIP   | 20 M        | HeLa      | PTBP1 | 12771193                                |
| iCLIP  | 10 M        | HeLa S3   | PTBP1 | 1752858                                 |

|        |       |         |       |          |
|--------|-------|---------|-------|----------|
| iCLIP  | 10 M  | HeLa S3 | PTBP1 | 3168007  |
| eCLIP  | 20 M  | HepG2   | Input | 6171975  |
| eCLIP  | 20 M  | HepG2   | PTBP1 | 7323798  |
| eCLIP  | 20 M  | HepG2   | PTBP1 | 4422769  |
| irCLIP | 1.8 M | HeLa    | PTBP1 | 34315701 |
| irCLIP | 1.8 M | HeLa    | PTBP1 | 27115619 |
| LACE   | 100 k | HeLa    | PTBP1 | 12986474 |
| LACE   | 100 k | HeLa    | PTBP1 | 15265703 |
| LACE   | 100 k | K562    | PTBP1 | 27711113 |
| LACE   | 100 k | K562    | PTBP1 | 3940355  |

The arrangement of the elements in the table (from top to bottom) corresponds to the box layout in **Figure 2h** (from left to right).

**Supplementary Table 3. Sample size for Figure 2h.**
